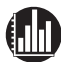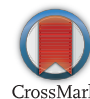

# Insulin Resistance Modulates Iron-Related Proteins in Adipose Tissue

José María Moreno-Navarrete,<sup>1</sup>  
 Marta G. Novelle,<sup>2</sup> Victoria Catalán,<sup>3</sup>  
 Francisco Ortega,<sup>1</sup> María Moreno,<sup>1</sup>  
 Javier Gomez-Ambrosi,<sup>3</sup> Gemma Xifra,<sup>1</sup>  
 Marta Serrano,<sup>1</sup> Ester Guerra,<sup>1</sup>  
 Wifredo Ricart,<sup>1</sup> Gema Frühbeck,<sup>3</sup>  
 Carlos Diéguez,<sup>2</sup> and  
 José Manuel Fernández-Real<sup>1</sup>

## OBJECTIVE

Circulating markers of iron overload are associated with insulin resistance. Less is known about the impact of iron overload on adipose tissue (AT). We hypothesized that gene expression markers of iron metabolism in AT could be associated with insulin action.

## RESEARCH DESIGN AND METHODS

The AT expression of ferroportin (*SLC40A1*), transferrin (*TF*), *TF* receptor (*TFRC*), ferritin (*FT*) heavy polypeptide 1 (*FTH1*), and *FT* light polypeptide (*FTL*) was analyzed cross-sectionally in three independent cohorts and also after weight loss-induced changes in insulin sensitivity (clamp *M* value) in an independent fourth cohort.

## RESULTS

In human AT, *TF* mRNA and protein levels were decreased with obesity and insulin resistance in the three cohorts and were positively associated with adipogenic mRNAs and insulin action. Otherwise, *FTL* mRNA and protein and *SLC40A1* transcripts were positively associated with BMI and negatively linked to adipogenic genes and insulin action. Bariatric surgery-induced weight loss led to increased *TF* and decreased *TFRC*, *FTH1*, *FTL*, and *SLC40A1* in subcutaneous AT in parallel to improved insulin action.

## CONCLUSIONS

These results suggest that iron overload impacts on AT in association with insulin resistance.

*Diabetes Care* 2014;37:1092–1100 | DOI: 10.2337/dc13-1602

In the last two decades, different epidemiologic studies have demonstrated that iron stores in the general population predict the development of the metabolic syndrome, glucose intolerance, type 2 diabetes (T2D) (1–6), and gestational diabetes mellitus (7,8). Dandona et al. (9) showed for the first time in patients with  $\beta$ -thalassemia that insulin resistance is associated with iron overload before sufficient  $\beta$ -cell damage occurs to result in diabetes. Insulin is known to stimulate iron uptake by adipocytes and hepatocytes (10). Reciprocally, iron interferes with insulin action in the liver. Frequent blood donations, leading to decreased iron

<sup>1</sup>Department of Diabetes, Endocrinology and Nutrition, Institut d'Investigació Biomèdica de Girona, Centro de Investigación Biomédica en Red Fisiopatología de la Obesidad y Nutrición (CB06/03/010), Instituto de Salud Carlos III, Girona, Spain

<sup>2</sup>Department of Physiology, School of Medicine, University of Santiago de Compostela, Centro de Investigación Biomédica en Red Fisiopatología de la Obesidad y Nutrición, Santiago de Compostela, Spain

<sup>3</sup>Department of Endocrinology and Metabolic Research Laboratory, Clínica Universidad de Navarra, and Centro de Investigación Biomédica en Red Fisiopatología de la Obesidad y Nutrición (CB06/03/1014), Instituto de Salud Carlos III, Pamplona, Spain

Corresponding author: José Manuel Fernández-Real, [jmfreal@idibgi.org](mailto:jmfreal@idibgi.org).

Received 8 July 2013 and accepted 27 November 2013.

This article contains Supplementary Data online at <http://care.diabetesjournals.org/lookup/suppl/doi:10.2337/dc13-1602/-/DC1>.

© 2014 by the American Diabetes Association. See <http://creativecommons.org/licenses/by-nc-nd/3.0/> for details.

stores, have been demonstrated to reduce postprandial hyperinsulinemia in healthy volunteers (11), to improve insulin sensitivity (12), and to constitute a protective factor for the development of T2D (13–15).

The link between iron and T2D has been reviewed and updated in several excellent manuscripts (16,17). Three systematic reviews and meta-analysis have confirmed the association of iron overload and increased T2D risk (18–20).

Circulating ferritin (FT) was also positively associated with visceral and subcutaneous fat area and with the degree of insulin resistance (21). Very recently, serum FT was found to be linked to adipocyte insulin resistance, defined as the product of fasting insulin and nonesterified fatty acids (22,23).

Despite these clinical associations, little attention has been paid to the molecular mechanisms regulating iron homeostasis in adipocytes. In the 3T3-L1 mouse cell line, two important iron-related genes (heavy FT [*FTH*] and iron regulatory protein [*IRP1*]) were found to be upregulated during adipocyte differentiation (24). Of note, adipocyte iron overload led to decreased adiponectin gene expression in association with insulin resistance in mice (23).

Despite these intriguing results, we found no studies dealing with human adipose tissue (AT). The few studies that have explored iron-related genes in AT were performed in rodent models. For instance, *FTH* and FT light chains (*FTL*) were increased in AT from obese rats, whereas transferrin expression (*TF*) was decreased (25).

To briefly summarize the most important factors involved in iron metabolism, it is important to recognize that ferroportin (FP or solute carrier family 40 [iron-regulated transporter], member 1 [*SLC40A1*]) plays a fundamental role in the release of iron from tissues into the bloodstream (26). The FP-mediated efflux of  $\text{Fe}^{2+}$  is negatively regulated by hepcidin (*HAMP*), a liver-derived peptide hormone that binds to FP and promotes its phosphorylation, internalization, and lysosomal degradation (27). Exported

iron is scavenged by TF, which maintains  $\text{Fe}^{3+}$  in a redox-inert state and delivers it into tissues through TF receptor (TFR). Interestingly, *FP*, *HAMP*, and *TFRC* gene expression is consistently expressed in AT from mice (23,28). FT is essential for the cell to store and detoxify excess intracellular iron in the cytosol. FT is a conserved protein consisting of 24 H (heavy) and L (light) subunits, encoded by *FTH1* and *FTL* genes (26). *FTH1* carries the ferroxidase activity that is necessary for iron deposition in nanocage, while *FTL* facilitates iron nucleation and increases the turnover of the ferroxidase site.

While circulating markers of iron overload are well-known to be associated with insulin resistance, less is known about the potential impact of iron overload on AT physiology. We hypothesized that iron overload has its effect on tissue expression and protein levels of different factors involved in iron metabolism (*SLC40A1*, *HAMP*, *TF*, *TFRC*, *FTH1*, and *FTL*) in association with systemic insulin action. After the initial results found in cross-sectional studies, we tested whether weight loss changes in insulin sensitivity lead to changes in the AT expression of these factors.

## RESEARCH DESIGN AND METHODS

### Subjects' Recruitments for AT Samples

AT samples were obtained from four independent cohorts. In the first and second cohort, a group of 174 (89 visceral AT [VAT] and 85 subcutaneous AT [SAT]) (cohort 1) and 71 VAT samples (cohort 2) from participants with normal body weight and different degrees of obesity, with BMI within 20–68  $\text{kg}/\text{m}^2$ , recruited at the Endocrinology Service of the Hospital of Girona Dr. Josep Trueta (cohort 1) and the Endocrinology Department of the Universidad de Navarra (cohort 2) were analyzed. In a third cohort of nondiabetic morbidly obese (BMI >35  $\text{kg}/\text{m}^2$ ) subjects with different degrees of insulin action (measured using hyperinsulinemic-euglycemic clamp), 32 paired SAT and VAT samples (cohort 3) were studied. These subjects were recruited at the Endocrinology Service of the Hospital of Girona Dr. Josep Trueta (Cohort 3).

All subjects were of Caucasian origin and reported that their body weight had

been stable for at least 3 months before the study. Subjects were studied in the postabsorptive state. BMI was calculated as weight in kilograms divided by the square of height in meters. They had no systemic disease other than obesity, and all were free of any infections in the previous month before the study. Liver diseases (specifically, tumoral disease and hepatitis C virus infection) and thyroid dysfunction were specifically excluded by biochemical workup. All subjects gave written informed consent, validated and approved by the ethics committee of the Hospital of Girona Dr. Josep Trueta and the Universidad de Navarra after the purpose of the study was explained to them.

AT samples were obtained from SAT and VAT depots during elective surgical procedures (cholecystectomy, surgery of abdominal hernia, and gastric bypass surgery). Samples of AT were immediately transported to the laboratory (5–10 min). The handling of tissue was carried out under strictly aseptic conditions. AT samples were washed in PBS, cut off with forceps and scalpel into small pieces (100 mg), and immediately flash frozen in liquid nitrogen before storage at  $-80^\circ\text{C}$ .

### Study of the Effects of Fat Mass Reduction Induced by Bariatric Surgery

In a fourth cohort, 25 Caucasian obese (mean  $\pm$  SD BMI  $43.7 \pm 4.6 \text{ kg}/\text{m}^2$ , age  $47 \pm 9$  years) subjects, who underwent bariatric surgery through Roux-en-Y gastric bypass in the Hospital of Girona Dr. Josep Trueta, were part of an ongoing study (29). Inclusion criteria were age between 30 and 60 years, BMI  $\geq 35 \text{ kg}/\text{m}^2$ , and ability to understand the study protocol. Exclusion criteria were use of medications that could interfere with insulin action and history of a chronic systemic disease. AT samples from the SAT depot were obtained during bariatric surgery. Postoperative samples of SAT were obtained by subcutaneous biopsy at the mesogastric level after 2 years from surgery. Fasting blood samples were obtained on the same day of the biopsy. All subjects gave written informed consent, validated and approved by the ethics committee of the Hospital of Girona Dr. Josep Trueta, after the purpose of the study was explained to them.

### Hyperinsulinemic-Euglycemic Clamp

Insulin action was determined by hyperinsulinemic-euglycemic clamp (30). After an overnight fast, two catheters were inserted into an antecubital vein, one for each arm, used to administer constant infusions of glucose and insulin and to obtain arterialized venous blood samples. A 2-h hyperinsulinemic-euglycemic clamp was initiated by a two-step primed infusion of insulin (80 mU/m<sup>2</sup>/min for 5 min, 60 mU/m<sup>2</sup>/min for 5 min) immediately followed by a continuous infusion of insulin at a rate of 40 mU/m<sup>2</sup>/min (regular insulin [Actrapid; Novo Nordisk, Plainsboro, NJ]). Glucose infusion began at minute 4 at an initial perfusion rate of 2 mg/kg/min being then adjusted to maintain plasma glucose concentration at 88.3–99.1 mg/dL. Blood samples were collected every 5 min for determination of plasma glucose and insulin. Insulin sensitivity was assessed as the mean glucose infusion rate during the last 40 min. In the stationary equilibrium, the amount of glucose administered (*M*) equals the glucose taken by the body tissues and is a measure of overall insulin sensitivity.

### Analytical Methods

Serum glucose concentrations were measured in duplicate by the glucose oxidase method using a Beckman glucose analyzer II (Beckman Instruments, Brea, California). Glycosylated hemoglobin (HbA<sub>1c</sub>) was measured by the high-performance liquid chromatography method (Bio-Rad, Muenchen, Germany, and autoanalyzer Jokoh HS-10, respectively). Intra- and interassay coefficients of variation were <4% for all these tests. Serum insulin was measured in duplicate by RIA (Medgenix Diagnostics, Fleunes, Belgium). The intra-assay coefficient of variation was 5.2% at a concentration of 10 mU/L and 3.4% at 130 mU/L. The interassay coefficients of variation were 6.9 and 4.5% at 14 and 89 mU/L, respectively. Homeostasis model assessment of insulin resistance (HOMA-IR) was calculated using the following formula: [insulin (mU/L) × glucose (mmol/L)]/22.5. Serum C-reactive protein (ultrasensitive assay; Beckman, Fullerton, CA) was determined by a routine laboratory test, with intra- and interassay

coefficients of variation <4%. The lower limit of detection was 0.02 mg/L.

### RNA Expression

RNA purification and gene expression procedures and analyses were performed as previously described (30). Briefly, RNA purification was performed using an RNeasy Lipid Tissue Mini kit (QIAGEN, IZASA S.A., Barcelona, Spain), and the integrity was checked by Agilent Bioanalyzer (Agilent Technologies, Palo Alto, CA). Gene expression was assessed by real time PCR using a LightCycler 480 Real-Time PCR System (Roche Diagnostics, Barcelona, Spain), using TaqMan and SYBRgreen technology suitable for relative genetic expression quantification. Primer/probe sets used are detailed in Supplementary Table 1.

### Protein Preparation

Proteins were extracted from AT by using a Polytron PT-1200C homogenizer (Kinematica AG, Lucerne, Switzerland) directly in radioimmunoprecipitation assay buffer (0.1% SDS, 0.5% sodium deoxycholate, 1% Nonidet P-40, 150 mmol/L NaCl, and 50 mmol/L Tris-HCl, pH 8.0), supplemented with protease inhibitors (1 mmol/L phenylmethylsulfonyl fluoride). Cellular debris and lipids were eliminated by centrifugation of the solubilized samples at 13,000 rpm for 60 min at 4°C, recovering the soluble fraction below the fat supernatant and avoiding the nonhomogenized material at the bottom of the centrifuge tube. Protein concentration was determined using the RC/DC Protein Assay (Bio-Rad Laboratories, Hercules, CA).

### TF and FT Protein Level Measurements

TF and FT levels in AT were measured by ELISA (ET3105-1 and EF2003-1, respectively; Assaypro LLC, Saint Charles, MO) following the manufacturer's instructions. For ET3105-1 (Human Transferrin ELISA kit), intra-assay and interassay coefficients of variation were 4.7% and 7.2% respectively, and for EF2003-1 (Human Ferritin ELISA kit) intra-assay and interassay coefficients of variation were 4.9% and 7.1%, respectively.

### Statistical Analyses

Statistical analyses were performed using the SPSS 12.0 software. Unless

otherwise stated, descriptive results of continuous variables are expressed as mean ± SD for Gaussian variables or median (interquartile range) for non-Gaussian variables. Parameters that did not fulfill normal distribution were mathematically transformed to improve symmetry for subsequent analyses. The relation between variables was analyzed by simple correlation (using Spearman and Pearson tests) and by multiple linear regression models. ANOVA and unpaired *t* tests were used to compare clinical variables and iron metabolism-related gene expression relative to obesity and T2D. Levels of statistical significance were set at *P* < 0.05.

## RESULTS

### Iron-Related Gene Expression in Human AT

Anthropometrical and clinical parameters of cohort 1 and 2 are shown in Table 1. Most of the studied genes were expressed at substantial levels in human AT. It is well-known that iron stores increase after menopause. In cohort 1, circulating FT concentration was significantly increased, whereas circulating TF concentration was decreased in postmenopausal women. Of note, VAT *FTL* gene expression was significantly increased in postmenopausal women and men compared with premenopausal women (24.2 ± 15.8 vs. 14.77 ± 5.2 relative gene expression units [R.U.], *P* = 0.02). In SAT, *FTL* gene expression also tended to be increased in postmenopausal women and men (28.5 ± 12.3 vs. 21.9 ± 10.7 R.U., *P* = 0.09). However, no significant differences in the expression of the other iron-related genes were found according to menopausal status or sex.

*HAMP* gene expression also was analyzed, but in comparison with the other iron-related genes studied *HAMP* mRNA levels were found at negligible levels (even undetectable in some samples). In both SAT and VAT, *TF* gene expression was significantly decreased in obese participants, mainly in those with T2D (Table 1), being significantly and negatively correlated with obesity measures and HOMA-IR (Tables 2 and 3). On the contrary, *SLC40A1* and *FTL* were significantly increased in obese participants and positively correlated with obesity measures and HOMA-IR

**Table 1—Anthropometric and clinical parameters together with AT gene expression data of study subjects from cohorts 1 and 2**

|                              | Cohort 1          |                    |                              |                              | <i>P</i>          |
|------------------------------|-------------------|--------------------|------------------------------|------------------------------|-------------------|
|                              | Lean              | Overweight         | Obese                        | Obese plus T2D               |                   |
| Participants ( <i>n</i> )    | 10                | 19                 | 37                           | 23                           |                   |
| Sex (men/women)              | 2/8               | 6/13               | 9/28                         | 8/15                         |                   |
| Age (years)                  | 48.9 ± 9.6        | 54.9 ± 15.2        | 44.6 ± 10.2#                 | 45.1 ± 11.3#                 | <b>0.01</b>       |
| BMI (kg/m <sup>2</sup> )     | 22.6 ± 1.5        | 27.4 ± 1.6*        | 44.5 ± 7.9*#                 | 44.4 ± 4.3*#                 | <b>&lt;0.0001</b> |
| Fat mass (%)                 | 28.01 ± 1.5       | 32.56 ± 6.1        | 55.81 ± 11.1*#               | 55.24 ± 9.5*#                | <b>&lt;0.0001</b> |
| Fasting glucose (mg/dL)      | 92.2 ± 8.9        | 91.2 ± 19.8        | 95.4 ± 13.5                  | 129.4 ± 48.7*#†              | <b>0.001</b>      |
| Fasting insulin (mU/L)       | 5.2 ± 2.7         | 7.4 ± 3.1          | 10.9 ± 4.4 ( <i>n</i> = 10)  | 26.9 ± 12.7 ( <i>n</i> = 7)# | <b>0.01</b>       |
| HOMA-IR                      | 1.21 ± 0.7        | 1.78 ± 0.9         | 2.74 ± 1.44 ( <i>n</i> = 10) | 7.52 ± 5.1 ( <i>n</i> = 7)   | 0.2               |
| HbA <sub>1c</sub> (%)        | 5.12 ± 0.09       | 4.99 ± 0.42        | 4.95 ± 0.53                  | 5.78 ± 1.72†                 | <b>0.04</b>       |
| HbA <sub>1c</sub> (mmol/mol) | 32 ± 1            | 31 ± 3.2           | 31 ± 3.5                     | 40 ± 14.6†                   | <b>0.04</b>       |
| VAT gene expression (R.U.)   |                   |                    |                              |                              |                   |
| <i>TF</i>                    | 0.022 ± 0.015     | 0.018 ± 0.015      | 0.0069 ± 0.0061*#            | 0.0047 ± 0.0030*#            | <b>&lt;0.0001</b> |
| <i>SLC40A1</i>               | 0.24 ± 0.07       | 0.27 ± 0.09        | 0.37 ± 0.15*#                | 0.34 ± 0.10*                 | <b>0.003</b>      |
| <i>FTL</i>                   | 9.41 ± 3.9        | 9.1 ± 3.5          | 13.22 ± 5.56*#               | 11.59 ± 3.91                 | <b>0.01</b>       |
| <i>TFR</i>                   | 0.036 ± 0.02      | 0.037 ± 0.03       | 0.031 ± 0.030                | 0.027 ± 0.019                | 0.6               |
| <i>FTH</i>                   | 0.011 ± 0.006     | 0.011 ± 0.005      | 0.0142 ± 0.0074              | 0.011 ± 0.0064               | 0.4               |
| SAT gene expression (R.U.)   |                   |                    |                              |                              |                   |
| <i>TF</i>                    | 0.024 ± 0.018     | 0.030 ± 0.03       | 0.019 ± 0.018                | 0.011 ± 0.0065*#†            | <b>0.03</b>       |
| <i>SLC40A1</i>               | 0.16 ± 0.07       | 0.13 ± 0.05        | 0.21 ± 0.11#                 | 0.22 ± 0.11#                 | <b>0.02</b>       |
| <i>FTL</i>                   | 13.86 ± 4.1       | 15.65 ± 12.16      | 19.11 ± 6.49                 | 18.28 ± 6.12                 | 0.1               |
| <i>TFR</i>                   | 0.024 ± 0.009     | 0.021 ± 0.008      | 0.023 ± 0.012                | 0.026 ± 0.019                | 0.8               |
| <i>FTH</i>                   | 0.017 ± 0.007     | 0.016 ± 0.008      | 0.013 ± 0.0072               | 0.0135 ± 0.0093              | 0.1               |
|                              | Cohort 2          |                    |                              | <i>P</i>                     |                   |
|                              | Lean              | Obese              | Obese plus T2D               |                              |                   |
| Participants ( <i>n</i> )    | 10                | 31                 | 30                           |                              |                   |
| Sex (men/women)              | 4/6               | 6/25               | 8/22                         |                              |                   |
| Age (years)                  | 46.6 ± 15.2       | 39.4 ± 14.1        | 40.3 ± 11.3                  | 0.3                          |                   |
| BMI (kg/m <sup>2</sup> )     | 22.18 ± 2.5       | 42.6 ± 4.1*        | 46.3 ± 7.8*                  | <b>&lt;0.0001</b>            |                   |
| Fat mass (%)                 | 27.32 ± 6.8       | 53.1 ± 4.7*        | 52.13 ± 7.8*                 | <b>&lt;0.0001</b>            |                   |
| Fasting glucose (mg/dL)      | 93.6 ± 17.2       | 90.3 ± 10.7        | 111.9 ± 23.2*†               | <b>&lt;0.0001</b>            |                   |
| Fasting insulin (mU/L)       | 6.6 ± 1.3         | 18.01 ± 16.4       | 20.9 ± 12.2                  | 0.2                          |                   |
| HOMA-IR                      | 1.4 ± 0.25        | 4.05 ± 3.8         | 5.8 ± 4.3                    | 0.08                         |                   |
| HbA <sub>1c</sub> (%)        | 5.3 ± 0.2         | 5.7 ± 0.3          | 7.4 ± 1.4*†                  | <b>0.02</b>                  |                   |
| HbA <sub>1c</sub> (mmol/mol) | 34 ± 0.9          | 39 ± 1.4           | 57 ± 8*†                     | <b>0.02</b>                  |                   |
| VAT gene expression (R.U.)   |                   |                    |                              |                              |                   |
| <i>TF</i>                    | 0.015 (0.01–0.03) | 0.019 (0.01–0.05)  | 0.012 (0.003–0.02)†          | <b>0.04</b>                  |                   |
| <i>SLC40A1</i>               | 0.09 (0.05–0.13)  | 0.30 (0.14–1.22)*  | 0.23 (0.18–0.36)*†           | <b>0.01</b>                  |                   |
| <i>FTL</i>                   | 4.7 (3.4–11.1)    | 16.7 (9.8–26.1)*   | 21.9 (9.7–49)*†              | <b>0.002</b>                 |                   |
| <i>FTH</i>                   | 0.032 (0.01–0.04) | 0.078 (0.06–0.13)* | 0.12 (0.08–0.19)*†           | <b>&lt;0.0001</b>            |                   |

Data are means ± SD or median (interquartile range) unless otherwise indicated. Boldface indicates statistically significant values. #*P* < 0.05 compared with overweight participants, performing Bonferroni post hoc test. \**P* < 0.05 compared with lean participants, performing Bonferroni post hoc test. †*P* < 0.05 compared with obese participants, performing Bonferroni post hoc test.

(Tables 2 and 3). No significant differences were found in *TFRC* and *FTH1* gene expression as regards obesity status (Table 1).

In both SAT and VAT, *TF* gene expression was positively associated with adipogenic (such as *PPAR*γ and *FASN*) and insulin-related pathway genes (*IRS1* and *GLUT4*) (Tables 2 and 3). These associations remained significant after

controlling for age and sex. VAT *TF* gene expression was also negatively associated with inflammatory gene markers (such as *TNF*α) (Table 2). Otherwise, SAT and VAT *FTL* and *SLC40A1* gene expression was positively associated with proinflammatory (in VAT) and negatively with adipogenic genes (Tables 2 and 3). In addition, in both SAT and VAT, *FTL*, *FTH1*, and *TFRC*

gene expression was significantly associated with that of the oxidative stress marker cytochrome b-245, α polypeptide (p22<sup>phox</sup> subunit or *CYBA* gene) (Tables 2 and 3). *CYBA* has been suggested as a marker of AT iron storage-induced oxidative stress via NADPH oxidase, being that *CYBA* gene expression is strongly associated with FT levels (31).

**Table 2—Bivariate correlation among VAT iron-related genes and anthropometric, clinical parameters as well as AT gene expression in subjects from cohorts 1, 2, and 3**

|                                                 | Cohort 1 (n = 89) |                   |                |                   |            |                   |            |              |            |              |
|-------------------------------------------------|-------------------|-------------------|----------------|-------------------|------------|-------------------|------------|--------------|------------|--------------|
|                                                 | TF (R.U.)         |                   | SLC40A1 (R.U.) |                   | FTL (R.U.) |                   | FTH (R.U.) |              | TFR (R.U.) |              |
|                                                 | r                 | P                 | r              | P                 | r          | P                 | r          | P            | r          | P            |
| Age (years)                                     | 0.28              | <b>0.006</b>      | −0.12          | 0.2               | 0.01       | 0.9               | −0.06      | 0.5          | 0.08       | 0.4          |
| BMI (kg/m <sup>2</sup> )                        | −0.54             | <b>&lt;0.0001</b> | 0.38           | <b>&lt;0.0001</b> | 0.28       | <b>0.007</b>      | 0.027      | 0.8          | −0.17      | 0.11         |
| Fat mass (%)                                    | −0.27             | <b>0.02</b>       | 0.23           | 0.05              | 0.21       | 0.08              | −0.08      | 0.5          | −0.09      | 0.4          |
| Fasting glucose (mg/dL)                         | −0.18             | 0.09              | 0.12           | 0.2               | −0.10      | 0.4               | −0.16      | 0.14         | −0.10      | 0.36         |
| Fasting insulin (mU/L)                          | −0.37             | <b>0.02</b>       | 0.30           | 0.06              | 0.20       | 0.3               | −0.22      | 0.2          | −0.19      | 0.2          |
| HOMA-IR                                         | −0.42             | <b>0.01</b>       | 0.35           | <b>0.04</b>       | 0.29       | 0.1               | −0.28      | 0.1          | −0.15      | 0.4          |
| HbA <sub>1c</sub>                               | 0.03              | 0.8               | −0.16          | 0.2               | −0.15      | 0.2               | −0.18      | 0.1          | −0.03      | 0.8          |
| PPAR $\gamma$ expression (R.U.)                 | 0.61              | <b>&lt;0.0001</b> | −0.59          | <b>&lt;0.0001</b> | 0.18       | 0.1               | 0.11       | 0.38         | 0.15       | 0.2          |
| IRS1 expression (R.U.)                          | 0.63              | <b>&lt;0.0001</b> | −0.26          | <b>0.01</b>       | −0.32      | <b>0.008</b>      | −0.026     | 0.8          | −0.11      | 0.4          |
| GLUT4 expression (R.U.)                         | 0.69              | <b>&lt;0.0001</b> | −0.45          | <b>&lt;0.0001</b> | −0.16      | 0.1               | 0.08       | 0.5          | 0.22       | 0.05         |
| FASN expression (R.U.)                          | 0.43              | <b>&lt;0.0001</b> | −0.46          | <b>&lt;0.0001</b> | −0.24      | <b>0.002</b>      | 0.01       | 0.9          | 0.07       | 0.5          |
| TNF $\alpha$ expression (R.U.)                  | −0.36             | <b>0.004</b>      | 0.29           | <b>0.008</b>      | 0.40       | <b>&lt;0.0001</b> | 0.35       | <b>0.002</b> | 0.18       | 0.1          |
| CYBA expression (R.U.)                          | −0.02             | 0.85              | 0.14           | 0.2               | 0.62       | <b>&lt;0.0001</b> | 0.20       | 0.06         | 0.28       | <b>0.008</b> |
|                                                 | Cohort 2 (n = 71) |                   |                |                   |            |                   |            |              |            |              |
|                                                 | r                 | P                 | r              | P                 | r          | P                 | r          | P            | r          | P            |
| Age (years)                                     | 0.18              | 0.1               | −0.06          | 0.6               | 0.03       | 0.7               | 0.03       | 0.7          |            |              |
| BMI (kg/m <sup>2</sup> )                        | −0.08             | 0.5               | 0.33           | <b>0.006</b>      | 0.38       | <b>0.001</b>      | 0.26       | <b>0.03</b>  |            |              |
| Fat mass (%)                                    | 0.17              | 0.1               | 0.26           | <b>0.03</b>       | 0.22       | 0.07              | 0.25       | <b>0.04</b>  |            |              |
| Fasting glucose (mg/dL)                         | −0.05             | 0.6               | −0.18          | 0.15              | 0.24       | 0.06              | 0.34       | <b>0.006</b> |            |              |
| Fasting insulin (mU/L)                          | −0.33             | <b>0.01</b>       | −0.07          | 0.6               | 0.03       | 0.8               | 0.10       | 0.4          |            |              |
| HOMA-IR                                         | −0.30             | <b>0.02</b>       | −0.11          | 0.4               | 0.05       | 0.6               | 0.15       | 0.2          |            |              |
| HbA <sub>1c</sub>                               | 0.04              | 0.8               | −0.07          | 0.6               | 0.12       | 0.3               | 0.14       | 0.2          |            |              |
|                                                 | Cohort 3 (n = 32) |                   |                |                   |            |                   |            |              |            |              |
|                                                 | r                 | P                 | r              | P                 | r          | P                 | r          | P            | r          | P            |
| Age (years)                                     | 0.06              | 0.7               | −0.30          | 0.05              | 0.26       | 0.1               | −0.1       | 0.5          | −0.1       | 0.5          |
| BMI (kg/m <sup>2</sup> )                        | −0.05             | 0.7               | 0.32           | <b>0.04</b>       | −0.15      | 0.4               | 0.18       | 0.2          | 0.15       | 0.3          |
| Fat mass (%)                                    | 0.11              | 0.5               | 0.21           | 0.2               | −0.16      | 0.3               | 0.19       | 0.2          | 0.08       | 0.6          |
| Fasting glucose (mg/dL)                         | 0.04              | 0.8               | 0.14           | 0.4               | −0.05      | 0.7               | 0.04       | 0.8          | −0.08      | 0.6          |
| HbA <sub>1c</sub>                               | −0.21             | 0.2               | 0.01           | 0.9               | 0.14       | 0.4               | 0.08       | 0.6          | 0.04       | 0.8          |
| Hyperinsulinemic-euglycemic clamp (mg/kg · min) | 0.52              | <b>0.002</b>      | −0.31          | 0.05              | −0.49      | <b>0.004</b>      | 0.21       | 0.2          | 0.26       | 0.1          |
| PPAR $\gamma$ expression (R.U.)                 | −0.11             | 0.5               | −0.51          | <b>0.001</b>      | 0.12       | 0.4               | 0.2        | 0.2          | 0.37       | <b>0.02</b>  |
| ADIPOQ expression (R.U.)                        | 0.34              | <b>0.03</b>       | −0.44          | <b>0.006</b>      | 0.27       | 0.1               | 0.14       | 0.4          | 0.26       | 0.1          |
| IRS1 expression (R.U.)                          | 0.19              | 0.2               | 0.43           | <b>0.007</b>      | −0.33      | <b>0.04</b>       | 0.26       | 0.1          | 0.28       | 0.08         |
| GLUT4 expression (R.U.)                         | 0.40              | <b>0.01</b>       | −0.07          | 0.7               | 0.22       | 0.2               | −0.1       | 0.5          | −0.16      | 0.3          |
| TNF $\alpha$ expression (R.U.)                  | −0.03             | 0.8               | 0.49           | <b>0.003</b>      | 0.37       | <b>0.03</b>       | −0.12      | 0.4          | −0.29      | 0.09         |
| CYBA expression (R.U.)                          | −0.35             | <b>0.04</b>       | 0.19           | 0.28              | 0.64       | <b>&lt;0.0001</b> | −0.07      | 0.7          | −0.15      | 0.4          |

Bivariate correlation was performed using nonparametric (Spearman) or parametric (Pearson) tests. Boldface indicates statistically significant values.

In cohort 2, similar associations with clinical parameters were found, being that *TF* gene expression significantly decreased in obese subjects with T2D and *SLC40A1*, *FTL*, and *FTH1* gene expression significantly increased in obese subjects (Fig. 1A and Tables 1 and 2).

We also explored a third cohort (cohort 3) of nondiabetic morbidly obese

participants (5 men and 27 women) in whom a euglycemic clamp procedure was performed. Anthropometrical and clinical parameters of this cohort include age ( $48.29 \pm 9.1$  years), BMI ( $43.8 \pm 6.9$  kg/m<sup>2</sup>), percent fat mass ( $56.1 \pm 10.1\%$ ), fasting glucose ( $96.03 \pm 12.01$  mg/dL), HbA<sub>1c</sub> ( $5.4 \pm 0.35\%$  [mmol/mol] [ $36 \pm 1.4$  mmol/mol]),

and hyperinsulinemic-euglycemic clamp ( $4.25 \pm 2.4$  mg/kg · min). *TF* gene expression was also positively associated with some adipogenic genes, whereas *SLC40A1* and *FTL* gene expressions tended to be negatively associated with these genes (Tables 2 and 3). Of note, the strong relationship between *FTL* and *CYBA* was maintained



**Table 3—Bivariate correlation among SAT iron-related genes and anthropometric, clinical parameters as well as AT gene expression in subjects from cohorts 1 and 3**

|                                                 | TF (R.U.) |                   | SLC40A1 (R.U.) |              | FTL (R.U.) |                   | FTH (R.U.) |                   | TFR (R.U.) |                   |
|-------------------------------------------------|-----------|-------------------|----------------|--------------|------------|-------------------|------------|-------------------|------------|-------------------|
|                                                 | <i>r</i>  | <i>P</i>          | <i>r</i>       | <i>P</i>     | <i>r</i>   | <i>P</i>          | <i>r</i>   | <i>P</i>          | <i>r</i>   | <i>P</i>          |
| <b>Cohort 1 (n = 85)</b>                        |           |                   |                |              |            |                   |            |                   |            |                   |
| Age (years)                                     | 0.19      | 0.06              | −0.049         | 0.65         | −0.33      | <b>0.004</b>      | −0.09      | 0.4               | −0.11      | 0.3               |
| BMI (kg/m <sup>2</sup> )                        | −0.34     | <b>0.002</b>      | 0.23           | <b>0.03</b>  | 0.29       | <b>0.005</b>      | −0.21      | 0.05              | 0.05       | 0.6               |
| Fat mass (%)                                    | −0.25     | <b>0.02</b>       | 0.03           | 0.8          | −0.08      | 0.5               | −0.18      | 0.08              | 0.04       | 0.7               |
| Fasting glucose (mg/dL)                         | −0.18     | 0.09              | 0.24           | <b>0.025</b> | 0.07       | 0.5               | 0.04       | 0.7               | 0.16       | 0.1               |
| Fasting insulin (mU/L)                          | −0.31     | 0.06              | 0.05           | 0.7          | 0.27       | 0.1               | 0.03       | 0.8               | 0.31       | 0.06              |
| HOMA-IR                                         | −0.37     | <b>0.03</b>       | 0.04           | 0.8          | 0.36       | <b>0.04</b>       | 0.10       | 0.5               | 0.35       | <b>0.04</b>       |
| HbA <sub>1c</sub>                               | 0.11      | 0.4               | 0.01           | 0.9          | −0.13      | 0.3               | 0.05       | 0.7               | 0.18       | 0.07              |
| PPAR $\gamma$ expression (R.U.)                 | 0.42      | <b>0.001</b>      | −0.44          | <b>0.001</b> | −0.25      | <b>0.03</b>       | 0.28       | <b>0.01</b>       | 0.13       | 0.3               |
| IRS1 expression (R.U.)                          | 0.38      | <b>0.001</b>      | 0.03           | 0.8          | −0.19      | 0.1               | 0.29       | <b>0.01</b>       | 0.05       | 0.7               |
| GLUT4 expression (R.U.)                         | 0.50      | <b>&lt;0.0001</b> | −0.30          | <b>0.01</b>  | −0.58      | <b>&lt;0.0001</b> | −0.02      | 0.8               | −0.37      | <b>0.002</b>      |
| FASN expression (R.U.)                          | 0.38      | <b>0.001</b>      | −0.29          | <b>0.01</b>  | −0.39      | <b>0.001</b>      | 0.16       | 0.2               | −0.25      | <b>0.04</b>       |
| TNF $\alpha$ expression (R.U.)                  | −0.03     | 0.8               | 0.1            | 0.4          | 0.02       | 0.8               | 0.28       | <b>0.01</b>       | 0.08       | 0.5               |
| CYBA expression (R.U.)                          | −0.06     | 0.6               | 0.26           | <b>0.01</b>  | 0.49       | <b>&lt;0.0001</b> | 0.46       | <b>&lt;0.0001</b> | 0.45       | <b>&lt;0.0001</b> |
| <b>Cohort 3 (n = 32)</b>                        |           |                   |                |              |            |                   |            |                   |            |                   |
| Age (years)                                     | 0.25      | 0.1               | 0.02           | 0.9          | 0.09       | 0.5               | −0.21      | 0.2               | 0.14       | 0.4               |
| BMI (kg/m <sup>2</sup> )                        | −0.12     | 0.4               | 0.09           | 0.6          | 0.14       | 0.4               | 0.39       | <b>0.01</b>       | 0.08       | 0.6               |
| Fat mass (%)                                    | 0.10      | 0.5               | 0.10           | 0.5          | 0.04       | 0.8               | 0.28       | 0.08              | 0.13       | 0.4               |
| Fasting glucose (mg/dL)                         | 0.10      | 0.5               | 0.30           | 0.05         | 0.13       | 0.4               | 0.26       | 0.1               | 0.21       | 0.2               |
| HbA <sub>1c</sub>                               | −0.10     | 0.5               | 0.21           | 0.2          | 0.21       | 0.2               | 0.47       | <b>0.003</b>      | 0.38       | <b>0.01</b>       |
| Hyperinsulinemic-euglycemic clamp (mg/kg · min) | 0.42      | <b>0.01</b>       | −0.26          | 0.1          | −0.32      | 0.06              | −0.23      | 0.2               | 0.03       | 0.8               |
| PPAR $\gamma$ expression (R.U.)                 | 0.23      | 0.17              | −0.34          | <b>0.04</b>  | −0.20      | 0.2               | 0.20       | 0.2               | 0.24       | 0.1               |
| ADIPOQ expression (R.U.)                        | 0.27      | 0.09              | −0.24          | 0.15         | −0.15      | 0.3               | 0.06       | 0.7               | 0.28       | 0.08              |
| IRS1 expression (R.U.)                          | 0.16      | 0.3               | 0.26           | 0.1          | −0.40      | <b>0.01</b>       | −0.01      | 0.9               | −0.03      | 0.8               |
| GLUT4 expression (R.U.)                         | 0.60      | <b>&lt;0.0001</b> | 0.08           | 0.6          | 0.07       | 0.7               | −0.49      | <b>0.002</b>      | −0.38      | <b>0.02</b>       |
| TNF $\alpha$ expression (R.U.)                  | 0.16      | 0.3               | 0.19           | 0.25         | 0.32       | 0.06              | 0.09       | 0.6               | −0.03      | 0.8               |
| CYBA expression (R.U.)                          | −0.06     | 0.7               | 0.25           | 0.1          | 0.66       | <b>&lt;0.0001</b> | 0.08       | 0.6               | −0.35      | <b>0.04</b>       |

Bivariate correlation was performed using nonparametric (Spearman) or parametric (Pearson) tests. Boldface indicates statistically significant values.

in this third cohort. TF and FTL gene expression were reciprocally associated with hyperinsulinemic-euglycemic clamp *M* value in both SAT and VAT (Tables 2 and 3 and Fig. 1B). All these associations remained significant after controlling for sex.

Interestingly, in the high-FT level group (defined as higher than the median: 51 ng/mL) in cohort 3, SAT SLC40A1 gene expression was significantly increased ( $0.16 \pm 0.08$  vs.  $0.11 \pm 0.06$  R.U.,  $P = 0.04$ ), whereas VAT TFRC were decreased ( $0.017 \pm 0.01$  vs.  $0.037 \pm 0.03$  R.U.,  $P = 0.03$ ).

#### TF and FT Protein Levels in Human AT

In a subgroup of 37 (5 nonobese and 32 obese) consecutive participants from cohort 1, TF and FT levels were measured by ELISA in AT. Both SAT and VAT TF and FT protein levels were strongly correlated with SAT and VAT TF and FTL gene expression, respectively (for TF,  $r = 0.65$ ,  $P = 0.03$ , and  $n = 11$  in SAT and  $r = 0.60$ ,  $P = 0.01$ , and  $n = 17$  in VAT; for FT,  $r = 0.76$ ,  $P = 0.006$ , and  $n = 11$

in SAT and  $r = 0.65$ ,  $P = 0.007$ , and  $n = 17$  in VAT). Surprisingly, SAT and VAT FT protein levels were not associated with FTH1 gene expression ( $r = -0.01$ ,  $P = 0.9$ , and  $n = 11$  in SAT and  $r = 0.15$ ,  $P = 0.4$ , and  $n = 17$  in VAT). Of note, in both SAT and VAT, TF levels were significantly reduced in obese participants ( $7.57 \pm 0.33$  vs.  $8.19 \pm 0.25$  ng/mg of SAT,  $P = 0.001$ , and  $7.89 \pm 0.34$  vs.  $8.58 \pm 0.18$  ng/mg of VAT,  $P < 0.0001$ ), whereas FT levels were significantly increased ( $3.35 \pm 1.71$  vs.  $2.05 \pm 0.23$  ng/mg of SAT,  $P = 0.004$ , and  $7.29 \pm 4.17$  vs.  $2.50 \pm 0.64$  ng/mg of VAT,  $P < 0.0001$ ). SAT and VAT TF and FT protein levels were reciprocally correlated with BMI ( $r = -0.46$ ,  $P = 0.004$ , and  $r = 0.43$ ,  $P = 0.009$ , respectively). In addition, TF protein levels were positively associated with lipogenic (FASN [ $r = 0.35$ ,  $P = 0.04$ ] and ACC1 [ $r = 0.47$ ,  $P = 0.005$ ]) and insulin-related (IRS1 [ $r = 0.34$ ,  $P = 0.06$ ]) gene expression, with ACC1 protein levels ( $r = 0.73$ ,  $P = 0.01$ , and  $n = 10$ ) in VAT, whereas in this fat depot, FT levels were inversely associated with IRS1

gene expression ( $r = -0.41$ ,  $P = 0.01$ ). In SAT, TF levels tended to be correlated with FASN ( $r = 0.34$ ,  $P = 0.06$ ) and IRS1 ( $r = 0.32$ ,  $P = 0.08$ ) gene expression. Interestingly, circulating TF concentration was significantly correlated with SAT TF gene expression ( $r = 0.56$ ,  $P = 0.03$ , and  $n = 14$ ).

#### Effects of Fat Mass Reduction (Bariatric Surgery–Induced Weight Loss)

Next, we hypothesized that bariatric surgery–induced weight loss in obese subjects would lead to release pressure on the mechanisms promoting AT expansion and improve insulin sensitivity and that these changes would have a reflection in iron-related gene expression in AT. Accordingly, in cohort 4, bariatric surgery–induced weight loss led to increased AT TF and decreased FTL, FTH1, SLC40A1, and TFR transcripts mirroring improved AT function and insulin action, increasing gene expression of adipogenic genes (typically downregulated in insulin resistant states), and decreasing

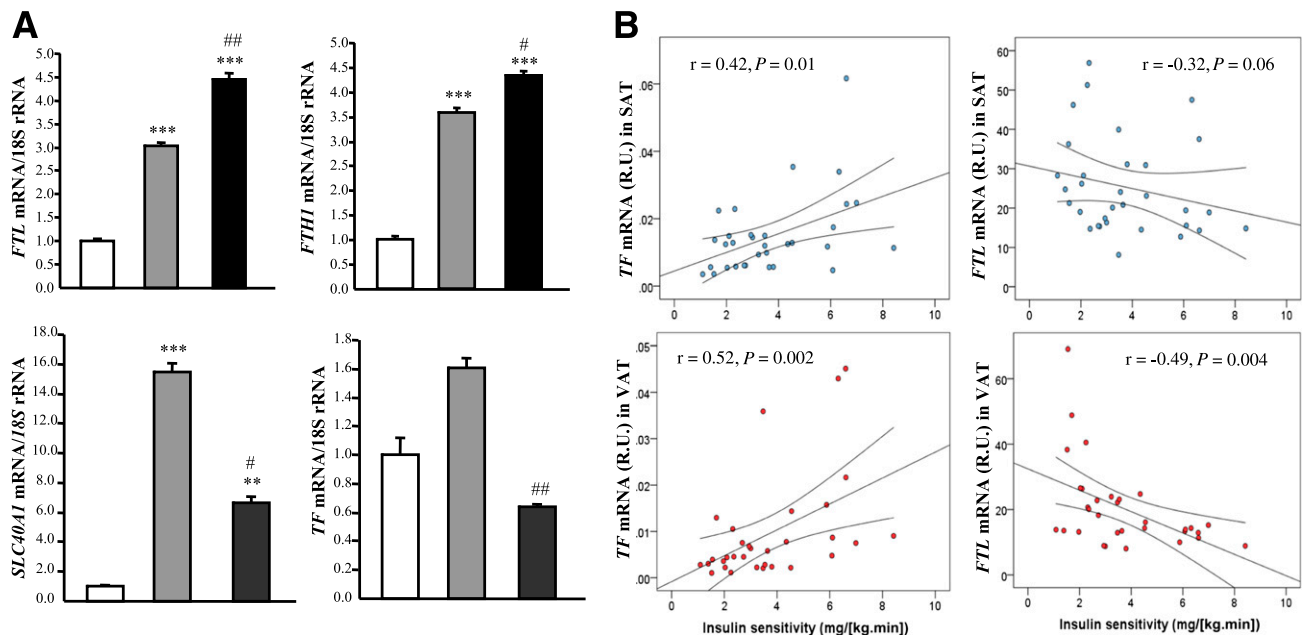

**Figure 1**—A: *FTL*, *FTH*, *SLC40A1*, and *TF* gene expression in VAT as regards obesity and T2D in cohort 2. These data are expressed as mean  $\pm$  SEM. White bars, lean participants; gray bars, normal glucose tolerant obese participants; black bars, impaired glucose tolerant and T2D obese participants. \*\*\* $P < 0.005$  compared with lean subjects. \*\*\* $P < 0.001$  compared with obese subjects. # $P < 0.05$  compared with obese subjects. ## $P < 0.005$  compared with obese subjects. B: Correlation between *TF* and *FTL* gene expression and insulin sensitivity (measured using euglycemic clamp) in SAT and VAT in cohort 3.

inflammatory genes (Supplementary Table 2). In addition, the percent change in weight loss positively correlated with *ADIPOQ* ( $r = 0.56$ ,  $P = 0.003$ ) and *TF* ( $r = 0.45$ ,  $P = 0.02$ ) and negatively with *LEP* ( $r = -0.64$ ,  $P = 0.001$ ), *TNF $\alpha$*  ( $r = -0.46$ ,  $P = 0.02$ ), *FTL* ( $r = -0.42$ ,  $P = 0.03$ ), *FTH1* ( $r = -0.42$ ,  $P = 0.03$ ), *TFRC* ( $r = -0.62$ ,  $P = 0.001$ ), and *CYBA* ( $r = -0.59$ ,  $P = 0.002$ ) gene expression. Of note, the percent of change of *TF* was significantly correlated with the percent change of *ADIPOQ* ( $r = 0.45$ ,  $P = 0.04$ ). The percent change of serum FT or TF did not correlate with the change of AT *TF*, *FTL*, *FTH1*, *SLC40A1*, or *TFRC* gene expression. It is well-known that bariatric surgery, especially Roux-en-Y gastric bypass, leads to iron deficiency that could interfere with the changes induced in gene expression after weight loss. However, we found no significant differences in serum FT 2 years after bariatric surgery (median 20.5 [interquartile range 8.25–52.5] vs. 37 [16.7–101.2] ng/mL,  $P = 0.3$ ). In fact, the changes in the expression of iron-related genes in AT were linked to weight reduction independently of iron stores.

## CONCLUSIONS

T2D patients are known to lose less weight after dieting than nondiabetic

obese subjects (32,33). Thus, it is important to explore the factors that are linked to limited AT renewal and resistance to weight loss. Iron could be one of these factors.

According to current findings, iron seems to accumulate in human AT with increased body fatness and impaired insulin action. In three independent cohorts, *FTL* (a marker of intracellular iron accumulation) and *SLC40A1* (an iron export mediator) were raised in obese and insulin-resistant subjects, while *TF* gene expression, known to be directly associated with iron uptake, was decreased. Interestingly, SAT *SLC40A1* gene expression was significantly increased, whereas VAT *TFRC* was decreased in association with high circulating FT concentration. In agreement with these results in humans, Dongiovanni et al. (34) recently described in mice that an iron-enriched diet led to iron accumulation in VAT in parallel to impaired insulin action in this tissue.

Healthy AT expansion is defined as an enlargement of AT through effective recruitment of adipogenic precursor cells to the adipogenic program, along with an adequate angiogenic response and appropriate remodeling of the

extracellular matrix (35–37). This “healthy” process is disturbed with obesity-associated metabolic disturbances (38–40). In this sense, the strong association between *TF* and adipogenic genes hints at *TF* as an important adipogenic component in association with AT expandability, possibly impacting on systemic glucose metabolism. On the other hand, the negative association of *FTL* and *SLC40A1* with adipogenic genes and their positive association with inflammatory and oxidative stress markers (*TNF $\alpha$*  and *CYBA*) pose iron accumulation as an important contributor to obesity-induced AT dysfunction and inflammation (38–40). Importantly, weight loss–induced improvement of insulin sensitivity led to parallel changes of iron-related gene expression. For instance, the increase of *TF* correlated positively with the increase of *ADIPOQ* gene expression. In agreement with these results, Tajima et al. (31) showed in mice that reduction of iron levels by deferoxamine, an iron chelator, inhibited the development of adipocyte hypertrophy through reduction of macrophage infiltration into fat tissue. These authors observed a parallel

reduction in oxidative stress and inflammatory cytokine production, leading to an improvement of glucose metabolism through improved insulin signaling in fat and skeletal muscle. The relationship described in our current study between FTL and CYBA (also named p22 [phox] or superoxide-generating NADPH oxidase light chain subunit) mRNA levels was previously reported by these authors in mice (31). It is well established that iron overload generates highly toxic hydroxyl radicals through Fenton chemistry (41). This oxidative damage might underlie the negative effects of iron overload on AT. Supporting this hypothesis, in a recent study iron and copper administration in standard diet-fed rats led to increased adipocyte hypertrophy, macrophage infiltration, and AT oxidative stress (42). Furthermore, supporting our findings, Gabrielsen et al. (23) showed in mice AT and 3T3-L1 cells that iron administration led to intracellular iron accumulation in adipocyte, decreasing *ADIPOQ* gene and protein expression and insulin action. These negative effects were reversed by iron restriction. This study also described functionally the positive role of SLC40A4 (as a cellular iron exporter) in AT, avoiding intracellular iron accumulation. Furthermore, they found that phlebotomy increases serum adiponectin levels in patients with high FT levels, suggesting an improvement in AT functionality (23).

Future studies should delineate how AT expression of these genes influence iron availability in the body. Until now, only tissue iron in the liver has been identified to be associated with systemic insulin action (43,44). AT iron should be evaluated in association with the expression of the different genes involved in iron metabolism. It is possible that this expression changes concomitantly with raised iron stores and impaired insulin action. In fact, we have found that AT FT, an indicator of AT iron, was positively associated with obesity and negatively with IRS1 mRNA levels. Further research is needed to explore this bidirectional cross-talk among insulin action, tissue iron, and the expression of iron-related genes.

To sum up, all these data emphasize that different markers of iron metabolism in

AT are associated with insulin action. Once insulin action is modified through weight loss, these markers change concomitantly and in the expected direction. More studies on how iron overload impacts on AT functionality are required.

**Acknowledgments.** The authors acknowledge the technical assistance of Gerard Pardo (Institut d'Investigació Biomèdica de Girona [IdIBGi]), Emili Loshuertos (IdIBGi), and Oscar Rovira (IdIBGi) and the administrative help of Roser Rodriguez (IdIBGi).

**Funding.** This work was partially supported by research grants FIS-PI11/00214, FIS-PI12/02631, and FIS-PI12/00515 from the Instituto de Salud Carlos III from Spain. CIBER de la Fisiopatología de la Obesidad y la Nutrición is an initiative from the Instituto de Salud Carlos III from Spain.

**Duality of Interest.** No potential conflicts of interest relevant to this article were reported.

**Author Contributions.** J.M.M.-N. participated in study design, data collection and analysis, and manuscript preparation and wrote and edited the manuscript. M.G.N. and G.X. participated in data collection and analysis and in manuscript preparation. V.C., F.O., M.M., J.G.-A., M.S., and E.G. participated in data collection and analysis. W.R. participated in manuscript preparation. C.D. participated in manuscript preparation and study design. G.F. and J.M.F.-R. participated in study design and wrote and edited the manuscript. J.M.M.-N. and J.M.F.-R. are the guarantors of this work and, as such, had full access to all the data in the study and take responsibility for the integrity of the data and the accuracy of the data analysis.

**Prior Presentation.** Parts of this study were presented in poster form at the 48th Annual Meeting of the European Association for the Study of Diabetes, Berlin, Germany, 1–5 October 2012.

## References

- Salonen JT, Tuomainen T-P, Nyyssönen K, Lakka H-M, Punnonen K. Relation between iron stores and non-insulin dependent diabetes in men: case-control study. *BMJ* 1998;317:727–730
- Jehn M, Clark JM, Guallar E. Serum ferritin and risk of the metabolic syndrome in U.S. adults. *Diabetes Care* 2004;27:2422–2428
- Fernández-Real JM, Ricart-Engel W, Arroyo E, et al. Serum ferritin as a component of the insulin resistance syndrome. *Diabetes Care* 1998;21:62–68
- Haap M, Fritsche A, Mensing HJ, Häring HU, Stumvoll M. Association of high serum ferritin concentration with glucose intolerance and insulin resistance in healthy people. *Ann Intern Med* 2003;139:869–871
- Fernández-Real JM, López-Bermejo A, Ricart W. Iron stores, blood donation, and insulin sensitivity and secretion. *Clin Chem* 2005;51:1201–1205
- Dekker LH, Nicolaou M, van der A DL, et al. Sex differences in the association between serum ferritin and fasting glucose in type 2 diabetes among South Asian Surinamese, African Surinamese, and ethnic Dutch: the population-based SUNSET study. *Diabetes Care* 2013;36:965–971
- Lao TT, Tam K-F. Maternal serum ferritin and gestational impaired glucose tolerance. *Diabetes Care* 1997;20:1368–1369
- Lao TTCP, Chan PL, Tam KF. Gestational diabetes mellitus in the last trimester - a feature of maternal iron excess? *Diabet Med* 2001;18:218–223
- Dandona P, Hussain MA, Varghese Z, Politis D, Flynn DM, Hoffbrand AV. Insulin resistance and iron overload. *Ann Clin Biochem* 1983;20:77–79
- Davis RJ, Corvera S, Czech MP. Insulin stimulates cellular iron uptake and causes the redistribution of intracellular transferrin receptors to the plasma membrane. *J Biol Chem* 1986;261:8708–8711
- Facchini FS. Effect of phlebotomy on plasma glucose and insulin concentrations. *Diabetes Care* 1998;21:2190
- Hua NW, Stoohs RA, Facchini FS. Low iron status and enhanced insulin sensitivity in lacto-ovo vegetarians. *Br J Nutr* 2001;86:515–519
- Ascherio A, Rimm EB, Giovannucci E, Willett WC, Stampfer MJ. Blood donations and risk of coronary heart disease in men. *Circulation* 2001;103:52–57
- Bofill C, Joven J, Bages J, et al. Response to repeated phlebotomies in patients with non-insulin-dependent diabetes mellitus. *Metabolism* 1994;43:614–620
- Fernández-Real JM, Peñarroja G, Castro A, García-Bragado F, Hernández-Aguado I, Ricart W. Blood letting in high-ferritin type 2 diabetes: effects on insulin sensitivity and  $\beta$ -cell function. *Diabetes* 2002;51:1000–1004
- Swaminathan S, Fonseca VA, Alam MG, Shah SV. The role of iron in diabetes and its complications. *Diabetes Care* 2007;30:1926–1933
- Rajpathak SN, Crandall JP, Wylie-Rosett J, et al. The role of iron in type 2 diabetes in humans. *Biochim Biophys Acta* 2009;1790:671–681
- Bao W, Rong Y, Rong S, Liu L. Dietary iron intake, body iron stores, and the risk of type 2 diabetes: a systematic review and meta-analysis. *BMC Med* 2012;10:119
- Zhao Z, Li S, Liu G, et al. Body iron stores and heme-iron intake in relation to risk of type 2 diabetes: a systematic review and meta-analysis. *PLoS ONE* 2012;7:e41641
- Kunutsor SK, Apekey TA, Walley J, Kain K. Ferritin levels and risk of type 2 diabetes



- mellitus: an updated systematic review and meta-analysis of prospective evidence. *Diabetes Metab Res Rev* 2013;29:308–318
21. Iwasaki T, Nakajima A, Yoneda M, et al. Serum ferritin is associated with visceral fat area and subcutaneous fat area. *Diabetes Care* 2005;28:2486–2491
  22. Wlazlo N, van Greevenbroek MM, Ferreira I, et al. Iron metabolism is associated with adipocyte insulin resistance and plasma adiponectin: the Cohort on Diabetes and Atherosclerosis Maastricht (CODAM) study. *Diabetes Care* 2013;36:309–315
  23. Gabrielsen JS, Gao Y, Simcox JA, et al. Adipocyte iron regulates adiponectin and insulin sensitivity. *J Clin Invest* 2012;122:3529–3540
  24. Festa M, Ricciardelli G, Mele G, Pietropaolo C, Ruffo A, Colonna A. Overexpression of H ferritin and up-regulation of iron regulatory protein genes during differentiation of 3T3-L1 pre-adipocytes. *J Biol Chem* 2000;275:36708–36712
  25. Farahani P, Chiu S, Bowlus CL, et al. Obesity in BSB mice is correlated with expression of genes for iron homeostasis and leptin. *Obes Res* 2004;12:191–204
  26. Wang J, Pantopoulos K. Regulation of cellular iron metabolism. *Biochem J* 2011;434:365–381
  27. Nemeth E, Ganz T. The role of hepcidin in iron metabolism. *Acta Haematol* 2009;122:78–86
  28. Bekri S, Gual P, Anty R, et al. Increased adipose tissue expression of hepcidin in severe obesity is independent from diabetes and NASH. *Gastroenterology* 2006;131:788–796
  29. Moreno-Navarrete JM, Escoté X, Ortega F, et al. A role for adipocyte-derived lipopolysaccharide-binding protein in inflammation- and obesity-associated adipose tissue dysfunction. *Diabetologia* 2013;56:2524–2537
  30. Moreno-Navarrete JM, Petrov P, Serrano M, et al. Decreased RB1 mRNA, protein, and activity reflect obesity-induced altered adipogenic capacity in human adipose tissue. *Diabetes* 2013;62:1923–1931
  31. Tajima S, Ikeda Y, Sawada K, et al. Iron reduction by deferoxamine leads to amelioration of adiposity via the regulation of oxidative stress and inflammation in obese and type 2 diabetes KKAY mice. *Am J Physiol Endocrinol Metab* 2012;302:E77–E86
  32. Wing RR, Marcus MD, Epstein LH, Salata R. Type II diabetic subjects lose less weight than their overweight nondiabetic spouses. *Diabetes Care* 1987;10:563–566
  33. Henry RR, Wallace P, Olefsky JM. Effects of weight loss on mechanisms of hyperglycemia in obese non-insulin-dependent diabetes mellitus. *Diabetes* 1986;35:990–998
  34. Dongiovanni P, Ruscica M, Rametta R, et al. Dietary iron overload induces visceral adipose tissue insulin resistance. *Am J Pathol* 2013;182:2254–2263
  35. Sun K, Kusminski CM, Scherer PE. Adipose tissue remodeling and obesity. *J Clin Invest* 2011;121:2094–2101
  36. Arner P, Arner E, Hammarstedt A, Smith U. Genetic predisposition for type 2 diabetes, but not for overweight/obesity, is associated with a restricted adipogenesis. *PLoS ONE* 2011;6:e18284
  37. Kim JY, van de Wall E, Laplante M, et al. Obesity-associated improvements in metabolic profile through expansion of adipose tissue. *J Clin Invest* 2007;117:2621–2637
  38. Virtue S, Vidal-Puig A. Adipose tissue expandability, lipotoxicity and the metabolic syndrome—an allostatic perspective. *Biochim Biophys Acta* 2010;1801:338–349
  39. Bourlier V, Zakaroff-Girard A, Miranville A, et al. Remodeling phenotype of human subcutaneous adipose tissue macrophages. *Circulation* 2008;117:806–815
  40. Ortega FJ, Mayas D, Moreno-Navarrete JM, et al. The gene expression of the main lipogenic enzymes is downregulated in visceral adipose tissue of obese subjects. *Obesity (Silver Spring)* 2010;18:13–20
  41. Lesnfsky EJ. Tissue iron overload and mechanisms of iron-catalyzed oxidative injury. *Adv Exp Med Biol* 1994;366:129–146
  42. Tinkov AA, Polyakova VS, Nikonov AA. Chronic administration of iron and copper potentiates adipogenic effect of high fat diet in Wistar rats. *Biometals* 2013;26:447–463
  43. Zheng X, Jiang T, Wu H, et al. Hepatic iron stores are increased as assessed by magnetic resonance imaging in a Chinese population with altered glucose homeostasis. *Am J Clin Nutr* 2011;94:1012–1019
  44. Haap M, Machann J, von Friedeburg C, et al. Insulin sensitivity and liver fat: role of iron load. *J Clin Endocrinol Metab* 2011;96:E958–E961
